# Supplementary material for: Systematic elucidation of interactive unfolding and corona formation of bovine serum albumin with cobalt ferrite nanoparticles
Source: Royal Society of Chemistry journal article supplement (doi:10.1039/c6ra02850k), 2016-01-01
Supplement: c6ra02850k1.pdf [file c6ra02850k1.pdf]

## Supplementary materials

# Systematic Elucidation of Interactive Unfolding and Corona Formation of Bovine serum albumin with Cobalt Ferrite Nanoparticles

Farooq Ahmad<sup>a\*‡</sup>, Ying Zhou<sup>a, b \*‡</sup>, Zhaoxing Ling<sup>a</sup>, Qingqing Xiang<sup>a</sup>, Xing Zhou<sup>c</sup>

<sup>a</sup>College of Chemical Engineering, Zhejiang University of Technology, Hangzhou, China

<sup>b</sup>Research Center of Analysis and Measurement, Zhejiang University of Technology, Hangzhou, China

<sup>c</sup>College of Atmospheric Science, Lanzhou University, Lanzhou, China

**‡Farooq Ahmad and Ying Zhou** contributed equally in this Manuscript and will be considered as co-first author and co-corresponding author as well.

\*Co-Corresponding and first author:

\*Farooq Ahmad

College of Chemical Engineering, Zhejiang University of Technology, Hangzhou 310032, Zhejiang, China

Tel.: +86 57188320666

Email: ahmadchemist@hotmail.com

\*Ying Zhou

Research Center of Analysis and Measurement, Zhejiang University of Technology, 18 Chaowang Road, Hangzhou 310032, Zhejiang Province, China.

Tel.: +86 571 88320568

E-mail: [yingzhou@zjut.edu.cn](mailto:yingzhou@zjut.edu.cn)

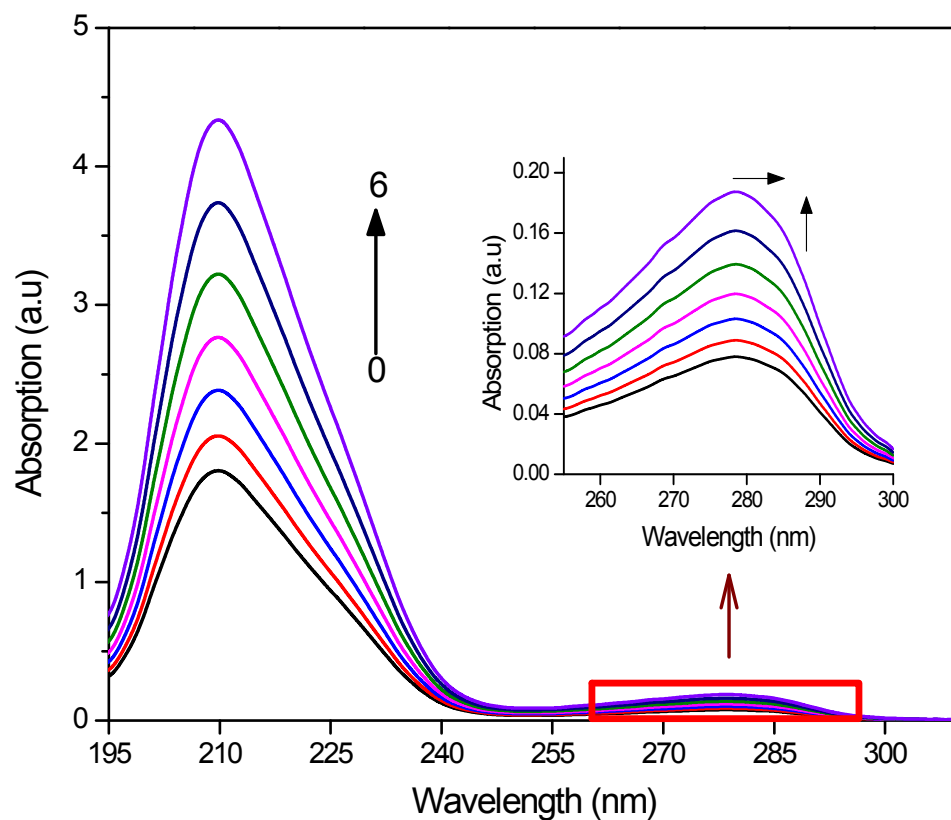

**ESI Fig. 1** UV-vis absorption spectra of BSA in various concentrations of  $\text{CoFe}_2\text{O}_4$  NPs. (0) 0, (1) 20, (2) 50, (3) 100, (4) 150, (5) 200 and (6) 250 ( $\mu\text{M}$ ), respectively. The concentration of BSA was fixed at 2  $\mu\text{M}$  in HBS buffer with  $\text{pH}=7.4$ .

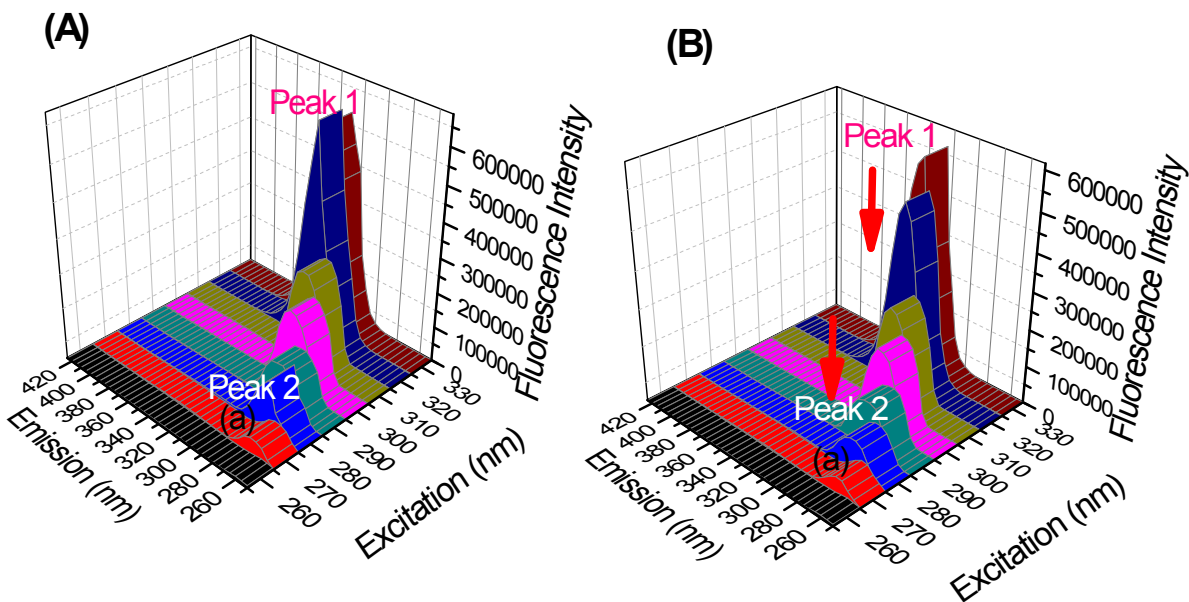

**ESI Fig. 2** Three-dimesnional emission spectra of BSA o the absence (A) and presence (B)  $\text{CoFe}_2\text{O}_4$  NPs. The concentration of  $\text{CoFe}_2\text{O}_4$  NPs was  $250\mu\text{M}$  while the concentration of BSA was fixed at  $2\mu\text{M}$ .
